# Supplementary material for: Quantitative evaluation of the actual hydrogen atom donating activities of O–H bonds in phenols: structure–activity relationship
Source: Royal Society of Chemistry journal article supplement (doi:10.1039/d2ra06877j), 2023-01-01
Supplement: d2ra06877j1.pdf [file d2ra06877j1.pdf]

## *Supporting Information for*

### **Quantitative Evaluation of the Actual Hydrogen Atom Donating Activities of O-H bonds in Phenols: Structure-Activity Relationship**

Yan-Hua Fu,<sup>\*†</sup> Yanwei Zhang,<sup>†</sup> Fang Wang,<sup>†</sup> Ling Zhao,<sup>†</sup> Guang-Bin Shen,<sup>\*§</sup> Xiao-Qing Zhu<sup>\*‡</sup>

<sup>†</sup> *College of Chemistry and Environmental Engineering, Anyang Institute of Technology, Anyang, Henan, 455000, China*

<sup>§</sup> *School of Medical Engineering, Jining Medical University, Jining, Shandong, 272000, P. R. China.*

<sup>‡</sup> *Department of Chemistry, Nankai University, Tianjin, 300071, China*

*E-mail: 20180031@ayit.edu.cn; gbshen@mail.jnmc.edu.cn; xqzhu@nankai.edu.cn*

|      |                                                                                   |    |
|------|-----------------------------------------------------------------------------------|----|
| SI   | Kinetic studies of the HAT reactions from XH to Y in literatures                  | S2 |
| SII  | $\Delta G^\circ(\text{XH})$ determined by the <i>iBonD</i> HM method in this work | S4 |
| SIII | Calculation process                                                               | S4 |
| SIV  | References                                                                        | S6 |

## SI. Kinetic studies of the HAT reactions from XH to Y in literatures

The second-order rate constants  $k_2$  and activation free energies  $\Delta G^\ddagger_{\text{XH/Y}}$  of HATs are listed in Table S1.

**Table S1.** Second-order rate constants ( $k_2$ ), activation free energies ( $\Delta G^\ddagger_{\text{XH/Y}}$ ) of HAT reactions (XH/CumO $\cdot$ ) and the references in CH<sub>3</sub>CN at 298 K.

| XH                                                                                  | Y    | $k_2$ (M <sup>-1</sup> s <sup>-1</sup> ) <sup>a</sup> | $\Delta G^\ddagger_{\text{XH/Y}}$ (kcal/mol) <sup>b</sup> | ref. |
|-------------------------------------------------------------------------------------|------|-------------------------------------------------------|-----------------------------------------------------------|------|
| 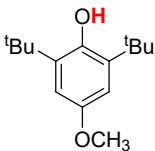   | PINO | $8.00 \times 10^4$                                    | 10.76                                                     | S2   |
|    | PINO | $6.00 \times 10^3$                                    | 12.29                                                     | S2   |
|   | PINO | $4.80 \times 10^3$                                    | 12.43                                                     | S2   |
|  | PINO | $1.50 \times 10^3$                                    | 13.11                                                     | S2   |
|  | DPPH | $5.00 \times 10^{-2}$                                 | 19.22                                                     | S4   |
|  | PINO | $3.60 \times 10^4$                                    | 11.23                                                     | S2   |
|  | DPPH | $1.50 \times 10^4$                                    | 11.75                                                     | S5   |
|  | PINO | $2.70 \times 10^6$                                    | 8.68                                                      | S2   |
|  | PINO | $1.40 \times 10^5$                                    | 10.43                                                     | S2   |

|  |      |                       |       |    |
|--|------|-----------------------|-------|----|
|  | PINO | $1.60 \times 10^4$    | 11.71 | S2 |
|  | DPPH | $8.60 \times 10^{-2}$ | 18.90 | S4 |
|  | PINO | $1.00 \times 10^4$    | 11.99 | S2 |
|  | DPPH | $1.10 \times 10^{-2}$ | 20.12 | S4 |
|  | PINO | $1.20 \times 10^6$    | 9.16  | S2 |
|  | DPPH | $1.90 \times 10^{-2}$ | 19.79 | S4 |
|  | DPPH | 5.00                  | 16.49 | S1 |
|  | DPPH | $6.40 \times 10^{-2}$ | 19.07 | S4 |
|  | DPPH | $3.40 \times 10^{-2}$ | 19.45 | S4 |
|  | DPPH | $1.20 \times 10^3$    | 13.25 | S1 |

|                                                                                     |      |                    |       |    |
|-------------------------------------------------------------------------------------|------|--------------------|-------|----|
| 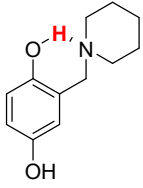   | DPPH | $2.34 \times 10^3$ | 12.85 | S1 |
|    | DPPH | $2.80 \times 10^2$ | 14.11 | S1 |
|    | PINO | $1.20 \times 10^5$ | 10.52 | S3 |
|    | PINO | $8.20 \times 10^4$ | 10.74 | S3 |
|   | PINO | $2.50 \times 10^8$ | 5.99  | S3 |
|  | DPPH | $4.90 \times 10^2$ | 13.78 | S6 |

<sup>a</sup> The uncertainty of date is smaller than 5%. <sup>b</sup> The date of  $\Delta G^\ddagger_{\text{XH/Y}}$  are derived from Eyring equation  $k_2 = (k_B T/h) \exp(-\Delta G^\ddagger/RT)$ .

### SII. $\Delta G^\circ(\text{XH})$ determined by theoretical calculation in this work

In order to obtain the electronic effects of the substituents at position 4, the changes of bond dissociation free energy  $\Delta \Delta G^\circ$  between H-substituted phenols (4H, 10H and 15H) and other substituents in the 2, 6-di-*tert*-butylphenol series, 2, 6-di-methylphenol series and 4-substituted phenols respectively, are compared in Table 2. The  $\Delta G^\circ(\text{XH})$  values of some 2, 6-di-*tert*-butylphenol series, 2, 6-di-methylphenol series and 4-substituted phenols determined by theoretical calculation in this work are listed in Table S2.

**Table S2.**  $\Delta G^\circ(\text{XH})$  of O-H bonds in phenols in  $\text{CH}_3\text{CN}$  at 298 K determined by the *i*BonD HM method in this work.

| XH | $\Delta G^\circ(\text{XH})$ (kcal/mol) <sup>a</sup> | XH | $\Delta G^\circ(\text{XH})$ (kcal/mol) <sup>a</sup> |
|----|-----------------------------------------------------|----|-----------------------------------------------------|
|----|-----------------------------------------------------|----|-----------------------------------------------------|

|                                                                                   |       |                                                                                   |       |
|-----------------------------------------------------------------------------------|-------|-----------------------------------------------------------------------------------|-------|
| 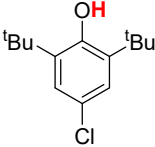 | 77.50 |  | 76.70 |
|  | 78.60 |                                                                                   |       |
|  | 80.90 |  | 85.40 |
|  | 83.70 |  | 87.80 |

<sup>a</sup>  $\Delta G^\circ(\text{XH})$  values are obtained by the *i*BonD HM method in this work.

### III. Calculation process

$\Delta G^\circ(\text{CumOO}^\bullet) = -41.63$  kcal/mol,  $\Delta G^\circ(\text{XH})$  of antioxidants should be within the scope of 44.35 ~49.80 kcal/mol, the calculation process is provided below.

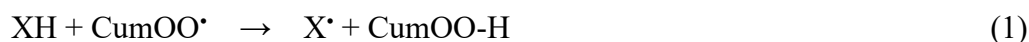

$$\Delta G^\ddagger_{\text{XH/CumOO}^\bullet} = \Delta G^\circ(\text{XH}) + \Delta G^\circ(\text{CumOO}^\bullet) \quad (2)$$

The magnitude of second-order rate constant for equation 1 is  $10 \sim 10^5 \text{ M}^{-1}\text{s}^{-1}$ , as it is easy and accurate to determine the rate constant by stopped-flow method.

According to Eyring equation:

$$k_2 = (k_B T/h) \exp(-\Delta G^\ddagger/RT) \quad (3)$$

When  $T = 298 \text{ K}$ , we substitute the constants into the eq 3 to obtain the relationship between the activation free energy  $\Delta G^\ddagger$  and the second-order rate constant  $k_2$ .

$$\Delta G^\ddagger = 1.36373 \times (12.7926 - \lg k_2) \quad (4)$$

When  $k_2 = 10 \text{ M}^{-1}\text{s}^{-1}$ ,  $\Delta G^\ddagger_{\text{XH/CumOO}^\bullet} = 16.08$  kcal/mol,

$$\Delta G^\circ(\text{XH}) = \Delta G^\ddagger_{\text{XH/CumOO}^\bullet} - \Delta G^\circ(\text{CumOO}^\bullet) = 49.80 \text{ kcal/mol}$$

When  $k_2 = 10^5 \text{ M}^{-1}\text{s}^{-1}$ ,  $\Delta G^\ddagger_{\text{BNAH/Y}} = 10.63$  kcal/mol,

$$\Delta G^\circ(\text{XH}) = \Delta G^\ddagger_{\text{XH/CumOO}^\bullet} - \Delta G^\circ(\text{CumOO}^\bullet) = 44.35 \text{ kcal/mol}$$

## References

- S1 R. Amorati, S. Menichetti, C. Viglianisib, M. C. Foti, *Chem. Commun.*, 2012, **48**, 11904-11906.
- S2 C. D' Alfonso, M. Bietti, G. A. DiLabio, O. Lanzalunga, M. Salamone, *J. Org. Chem.*, 2013, **78**, 1026-1037.
- S3 M. Mazzonna, M. Bietti, G. A. DiLabio, O. Lanzalunga, M. Salamone, *J. Org. Chem.*, 2014, **79**, 5209-5218.
- S4 G. Litwinienko, K. U. Ingold, *J. Org. Chem.*, 2003, **68**, 3433-3438.
- S5 G. Litwinienko, K. U. Ingold, *J. Org. Chem.*, 2005, **70**, 8982-8990.
- S6 L. Valgimigli, J. T. Banks, J. Lusztyk, K. U. Ingold, *J. Org. Chem.*, 1999, **64**, 3381-3383.
